# Supplementary material
Source: PubMed Central journal article supplement (PMC6301072)
Supplement: NIHMS996413-supplement-SI-1.pdf [file NIHMS996413-supplement-SI-1.pdf]

1 **Supporting Information For**  
2  
3 **Comprehensive screening links halogenated organic compounds with**  
4 **testosterone levels in male *Delphinus delphis* from the Southern**  
5 **California Bight**

6 *Marisa L. Trego*<sup>\*†</sup>, *Eunha Hoh*<sup>§</sup>, *Nicholas M. Kellar*<sup>\*</sup>, *Sara Meszaros*<sup>\*</sup>, *Michelle*  
7 *Robbins*<sup>‡</sup>, *Nathan G. Dodder*<sup>\*</sup>, *Andrew Whitehead*<sup>†</sup>, and *Rebecca L. Lewison*<sup>\*</sup>

8 <sup>\*</sup>Department of Biology, San Diego State University, 5500 Campanile Dr., San Diego,  
9 CA, 92182, USA

10 <sup>†</sup>Department of Environmental Toxicology, University of California Davis, 1 Shields  
11 Avenue, Davis, CA, 95616, USA

12 <sup>§</sup>Graduate School of Public Health, San Diego State University, 5500 Campanile Dr., San  
13 Diego, CA, 92182, USA

14 <sup>‡</sup>Southwest Fisheries Science Center, MMTD, NMFS, NOAA, 8901 La Jolla Shores Dr.,  
15 La Jolla, CA, 92037, USA

16 <sup>‡</sup>Ocean Associates, Inc., under contract to the Southwest Fisheries Science Center,  
17 National Marine Fisheries Service, National Oceanic and Atmospheric Administration –  
18 USA

19  
20  
21

22     **CONTENTS**

23     Materials and Methods.....S2-S5

24     Table S1.....S6

25     Table S2.....S7-S9

26     Figure S1.....S10

27     Figure S2.....S11

28     Figure S3.....S12

29     Figure S4.....S13

30     Figure S5.....S14

31     References.....S15

32

33

34     **MATERIALS AND METHODS**

35

36     *Data analysis*

37

38     *Characterizing HOC profiles in Delphinus delphis*

39

40 We calculated the mean relative abundance and standard error for each compound class  
41 according to maturity status and compound origin (anthropogenic, natural, and unknown).  
42 To reduce the dimension of the data and to identify co-occurring compound classes, we ran  
43 a PCA on all 16 individuals with the logged sum of the relative abundance of all 26  
44 compound classes (167 individual total congeners) as variables.

45

#### 46 *Identifying maturity-related HOC bioaccumulation*

47

48 We used Mann-Whitney U tests to evaluate significant differences in overall number of  
49 compounds and total relative abundance between maturity status. We then created a  
50 Random Forest model to examine differences in compound class abundance between  
51 mature and immature individuals using the randomForest R package<sup>1</sup>. Permutation tests  
52 were conducted with the rfPermute package<sup>2</sup> to determine significance for each compound  
53 class. Compound class abundances were calculated only using compounds found in 10 or  
54 more individuals (76 compounds from 23 classes). Because Random Forest cannot be  
55 conducted with missing data, we estimated the relative abundance for the five excluded  
56 peaks from 3 different individuals by measuring the best available peak areas. These five  
57 measurements were only used in random forest analyses and were excluded from all other  
58 analyses and data summaries. A compound class was considered significant when  
59 permutation tests calculated a p-value of 0.05 or below.

60

61 *Evidence of endocrine disruption*

62

63 Differences in log testosterone levels due to maturity status were evaluated with t-tests.  
64 We then ran a linear regression between the first axis of principal component analysis  
65 (PC1; which represented variation in 15 anthropogenic and unknown compound classes),  
66 and blubber testosterone level to examine how endocrine health is related to HOC  
67 exposure. We regressed the negative value of PC1 (because PC1 was negatively related  
68 with prominent compound abundance) with age to control for age-related variation in HOC  
69 load and extracted the residuals from the model as a proxy of the variation not explained  
70 simply by age. Similarly, the log of blubber testosterone was regressed with average gonad  
71 mass. If both gonad mass were unavailable, we included only the right gonad mass.  
72 Residuals from each of the PC1-age and testosterone-gonad mass models were then used  
73 in a linear model to compare age-corrected PC1 (as the predictor variable) with gonad  
74 mass-corrected testosterone (the response variable). The logged sum of the congeners in  
75 the PC1 group were similarly age-corrected. The age correction was done by building a  
76 model with age and HOC load and extracting the residuals. The variation not explained  
77 simply by the age model was then used in the linear regression with testosterone (corrected  
78 by gonad mass) as above to confirm that this trend can be explained by the compound  
79 classes of interest. In mature individuals, the non-age corrected sum of the PC1 compounds  
80 were log transformed and regressed directly with gonad mass-corrected testosterone.

81 We constructed two additional Random Forest regression models on mature individuals  
82 to explore the effects of HOCs on testes endocrine function (classes: mtry = 7, ntree =

83 4,000, nrep = 2,000; individual compounds: mtry = 13, ntree = 8,000, nrep = 4,000). For  
84 both Random Forest analyses, we used only compounds found in 10 or more individuals  
85 (76 compounds from 23 classes) in mature individuals to exclude confounding factors due  
86 to bioaccumulation with age. The focus on mature individuals also reflects the greater  
87 likelihood that impaired or compromised testes function can be detected in mammals  
88 during near maximum testosterone production, i.e. when there is the greater physiological  
89 demand to reproduce.<sup>3</sup> The Random Forest models included gonad mass-corrected  
90 testosterone as the response variable and either compound class abundance or individual  
91 congener abundance as the predictor variable. Compound classes were considered  
92 significant when permutation tests calculated a p-value of 0.05 or below. In case of non-  
93 convergence (i.e. conflicting model results), we also assessed variable importance, or the  
94 mean decrease in accuracy when removed from the model (%IncMSE), where a higher  
95 variable importance represents a larger increase in predictive power with the inclusion of  
96 the predictor variable.

97

98

99

100

101

102

103

## TABLES AND FIGURES

**Table S1:** The month and year of sample collection, maturity, and age for each of the individuals that were included in this research.

| <b>ID</b> | <b>YEAR</b> | <b>MONTH</b> | <b>Maturity</b> | <b>Age</b> |
|-----------|-------------|--------------|-----------------|------------|
| EPM0299   | 2005        | 9            | I               | 0.3        |
| MCM0005   | 2003        | 11           | I               | 0.5        |
| KAS0142   | 2006        | 11           | I               | 0.6        |
| CXG0035   | 2008        | 11           | I               | 1.0        |
| CYM0100   | 2008        | 11           | I               | 1.2        |
| JXA0060   | 2000        | 11           | I               | NA         |
| SXC0035   | 1999        | 11           | J               | 6.5        |
| SMC0119   | 2002        | 1            | J               | 7.2        |
| JEA0085   | 2000        | 11           | M               | 12.8       |
| BXD0036   | 2004        | 11           | M               | 13.0       |
| PBW0002   | 2001        | 12           | M               | 13.0       |
| MKW0020   | 2003        | 12           | M               | 13.2       |
| SMH0021   | 1999        | 1            | M               | 13.8       |
| KSS0008   | 2008        | 10           | M               | 14.3       |
| TCL0090   | 2005        | 12           | M               | 18.0       |
| BXD0003   | 2003        | 10           | M               | NA         |

**Table S2:** A list of the compounds and corresponding group name detected across all 16 samples. For compound structure, identification, mass spectrum and chromatographic information, see Supplemental Material for Shaul et al<sup>4</sup>. The origin of each compound class is represented by the following: anthropogenic [A], natural [N], mixed [M], and unknown[U].

**Brominated/chlorinated diphenyl ether (B/CDE) [U]**

PBCDE Br<sub>3</sub>Cl<sub>3</sub>

**Brominated-anisole [M]**

2,4,6-tribromo anisole

**Brominated-indole [N]**

4,6-dibromoindole

5-bromoindole

**Chlordane-related [A]**

alpha chlordane  
 chlordane related 2  
 chlordane related 4  
 chlordane related 6  
 chlordane related 7  
 chlordane related 9  
 chlordane related 10  
 chlordane related 13  
 chlordane related 14  
 cis nonachlor  
 gamma chlordane  
 oxychlordane  
 trans nonachlor

**Chlorinated-benzene [A]**

1,2,3,4-tetrachlorobenzene  
 hexachlorobenzene  
 pentachlorobenzene

**Chlorinated-styrene [A]**

ethenyl benzene 3Cl  
 polychlorinated styrene 7Cl

**Chlorobenzaldehyde [U]**

Chlorobenzaldehyde

**Dichlorodiphenyltrichloroethane-related (DDT-related) [A]**

DDMU 1  
 DDMU 2  
 DDMU 3  
 DDMU 4  
 DDT related 2  
 DDT related 3  
 DDT related 12  
 DDT related 14  
 DDT related 16  
 DDT related 18  
 DDT related 20  
 DDT related 23  
 o,p'-DDD  
 p,p'-DDD

**Dichlorobenzophenone [A]**

4,4'-dichlorobenzophenone

**Dimethyl bipyrroles (DMBPs) [N]**

DMBP Br<sub>2</sub>Cl<sub>2</sub> 1  
 DMBP Br<sub>2</sub>Cl<sub>3</sub>  
 DMBP Br<sub>2</sub>Cl<sub>4</sub>  
 DMBP Br<sub>3</sub>Cl<sub>2</sub> 1  
 DMBP Br<sub>3</sub>Cl<sub>2</sub> 4  
 DMBP Br<sub>3</sub>Cl<sub>3</sub>  
 DMBP Br<sub>4</sub>Cl 1  
 DMBP Br<sub>4</sub>Cl 2  
 DMBP Br<sub>4</sub>Cl<sub>2</sub>  
 DMBP Br<sub>5</sub>Cl  
 DMBP 4Br 1

**Dimethyl bipyrroles (DMBPs) [N]  
(cont'd)**

DMBP 4Br 2  
DMBP 4Br 3  
DMBP 5Br 1  
DMBP 5Br 2  
DMBP 6Br  
DMBP 6Cl

**Hexachlorocyclohexane-related  
(HCH-related) [A]**

alpha BHC  
beta BHC  
cyclohexene 4Cl 1

**Heptachlor-related [A]**

heptachlor epoxide  
heptachlor related 1  
heptachlor related 2  
heptachlor related 3

**Methyl bipyrroles (MBPs) [N]**

MBP 4Br 1  
MBP 4Br 2  
MBP 4Br 3  
MBP 4Br 4  
MBP 6Cl 1  
MBP 6Cl 2  
MBP 6Cl 3  
MBP 7Cl

**Methoxy brominated/chlorinated  
diphenyl ether (MeO-B/CDE) [N]**

MeOBCDE Br3Cl

**Methoxy brominated diphenyl ether  
(MeO-BDE) [N]**

2'-MeOBDE-68  
6-MeOBDE-47  
MeOBDE 3Br  
MeOBDE 4Br

**Methoxy polybrominated biphenyl  
(MeO-PBB) [N]**

di-MeOPBB-80

**Methylenebistrichloroanisole [A]**

Methylenebistrichloroanisole

**Methylsulfonyl polychlorinated  
biphenyl (Methylsulfonyl-PCB) [A]**

methylsulfonylPCB 5Cl 1  
methylsulfonylPCB 5Cl 2  
methylsulfonylPCB-101

**Mirex-related [A]**

mirex  
mirex 1Cl  
mirex 2Cl 1  
mirex 2Cl 2  
mirex related 1

**Polybrominated biphenyl (PBB) [A]**

BB-49  
BB-52  
BB-101  
BB-153  
BB 4Br 1  
BB 5Br 2

**Polybrominated diphenyl ethers  
(PBDEs) [A]**

BDE-17/25  
BDE-28/33  
BDE-47  
BDE-49  
BDE-66  
BDE-75  
BDE-99  
BDE-100  
BDE-116  
BDE-153  
BDE-154  
BDE-155  
BDE 5Br 1

**Polybrominated hexadroxanthene  
derivative (PBHD) [N]**

PBHD 3Br 1  
PBHD 3Br 2  
PBHD 3Br 3  
PBHD 4Br



**Pyrrolidinecarbonyl-chloride [A]**  
pyrrolidinecarbonyl chloride

**Tris(chlorophenyl)methane  
(TCPM) [A]**

TCPM  
TCPM 1  
TCPM 2  
TCPM 3  
TCPM 4  
TCPM 4Cl 1  
TCPM 4Cl 2  
TCPM 4Cl 3  
TCPM 5  
TCPM 6

**Tris(chlorophenyl)methanol  
(TCPMOH) [A]**

TCPME

**Unknown [U]**

unknown-11  
unknown-13  
unknown-14  
unknown-15  
unknown-17  
unknown-21  
unknown-22  
unknown-27  
unknown-32  
unknown-34  
unknown-35  
unknown-36  
unknown-38  
unknown-39  
unknown-41  
unknown-43  
unknown-44  
unknown-46  
unknown-47  
unknown-49

**Unknown [U] (cont'd)**

unknown-55  
unknown-56

**Unknown-2 [U]**

unknown-2-2  
unknown-2-3  
unknown-2-4  
unknown-2-5  
unknown-2-8  
unknown-2-10

**Unknown-3 [U]**

unknown-3-1  
unknown-3-2  
unknown-3-3

**Unknown-4 [U]**

unknown-4-2  
unknown-4-3  
unknown-4-5  
unknown-4-8  
unknown-4-11  
unknown-4-12  
unknown-4-13  
unknown-4-14  
unknown-4-16  
unknown-4-17

**Unknown-5 [U]**

unknown-5-2

**Unknown-6 [U]**

unknown-6-1  
unknown-6-3

**Unknown-7 [U]**

unknown-7-1  
unknown-7-2

**Unknown-8 [U]**

unknown-8-2

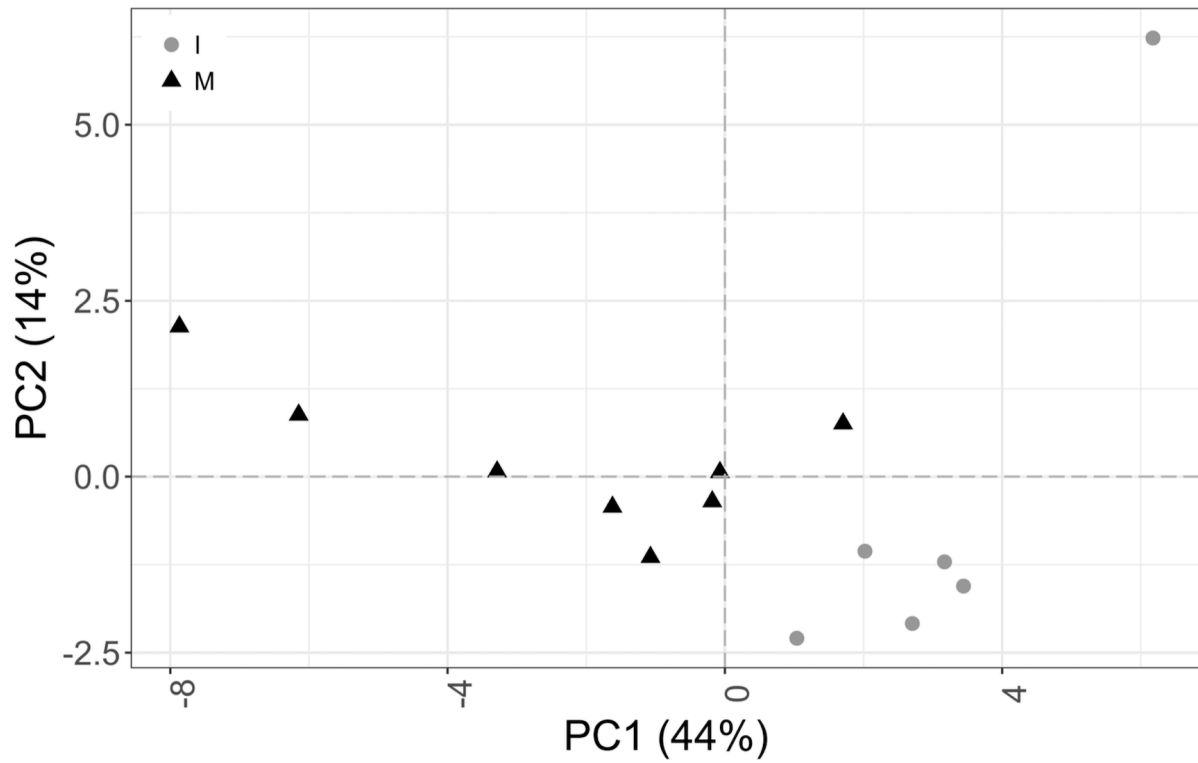

**Figure S1:** A principal components analysis (PCA) plot of the samples according to maturity (mature/M and immature/I).

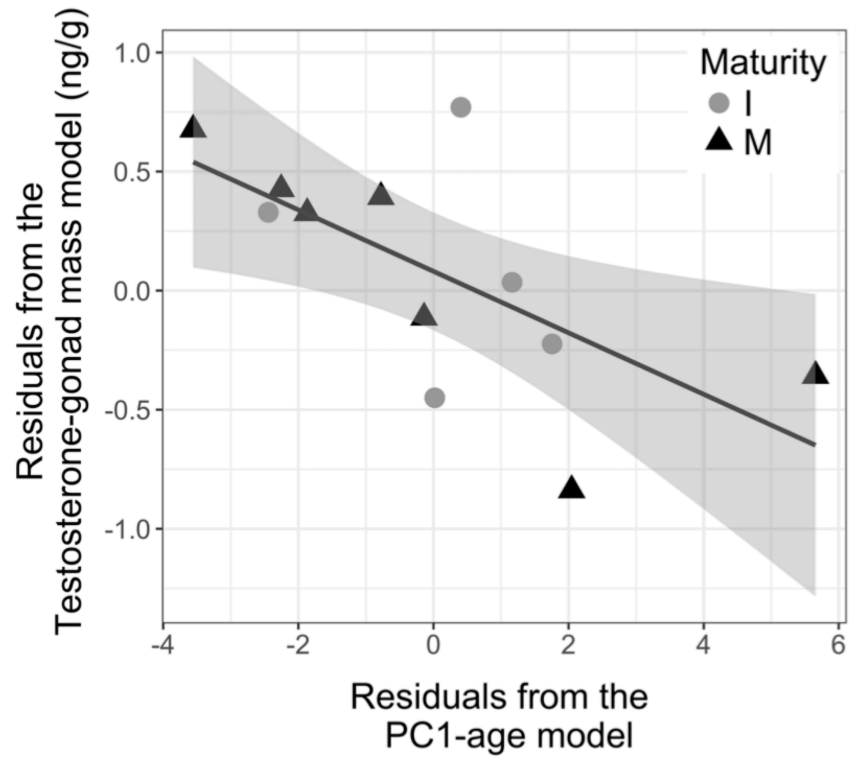

**Figure S2:** Regressions examining the relationship between PC1 (adjusted for age) and blubber testosterone (adjusted for gonad mass). Circles and triangles represent data from immature and mature animal samples, respectively.

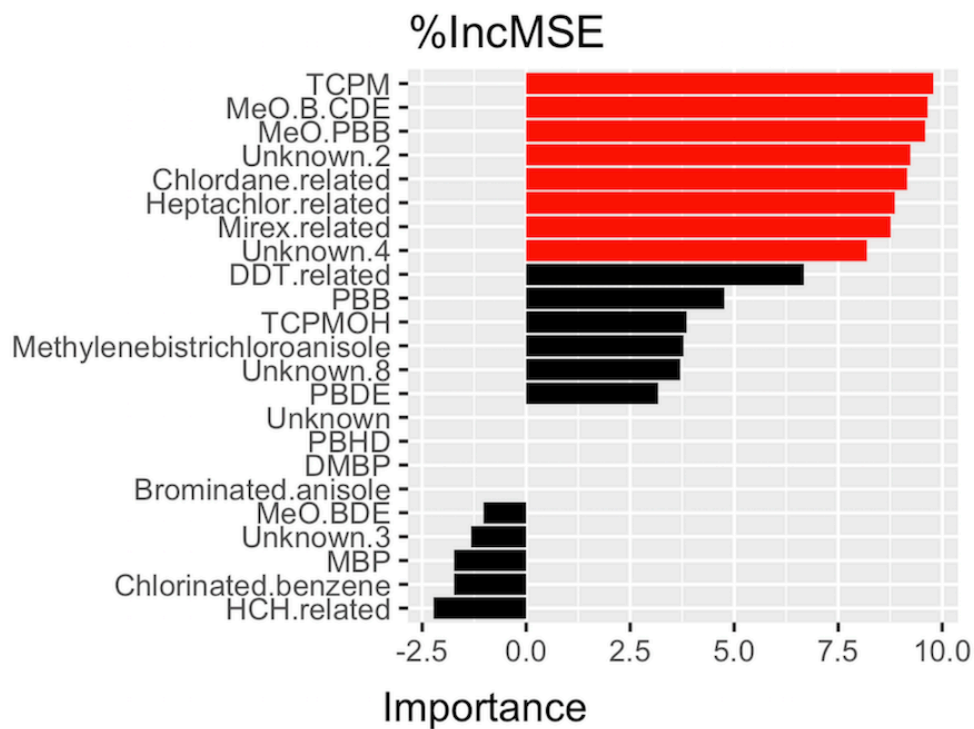

**Figure S3:** The mean decrease in accuracy when removed from the model (%IncMSE) for all compound classes. Red bars represent significant variables with  $p < 0.05$ .

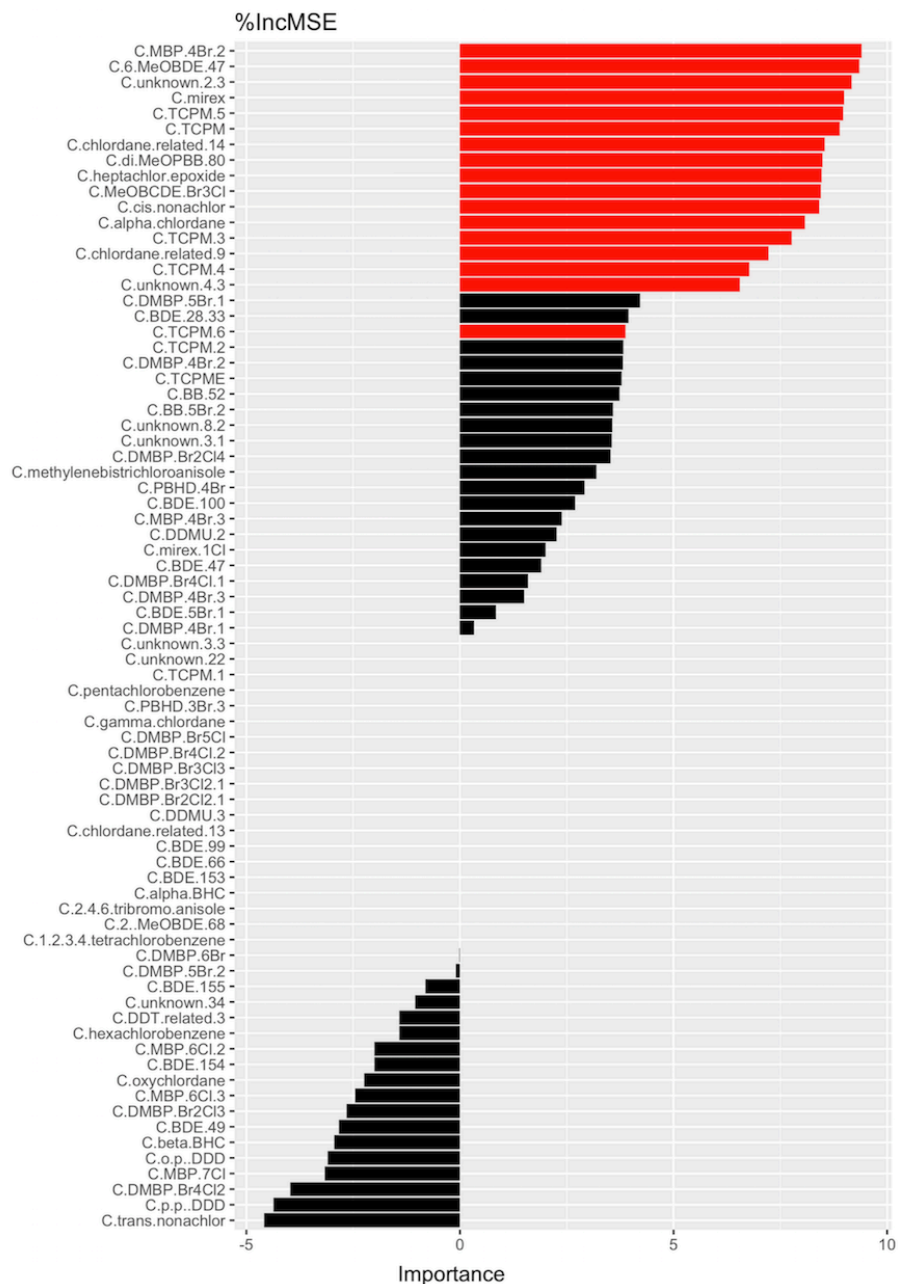

**Figure S4:** The mean decrease in accuracy when removed from the model (%IncMSE) for all compounds. Red bars represent significant variables with  $p < 0.05$ .

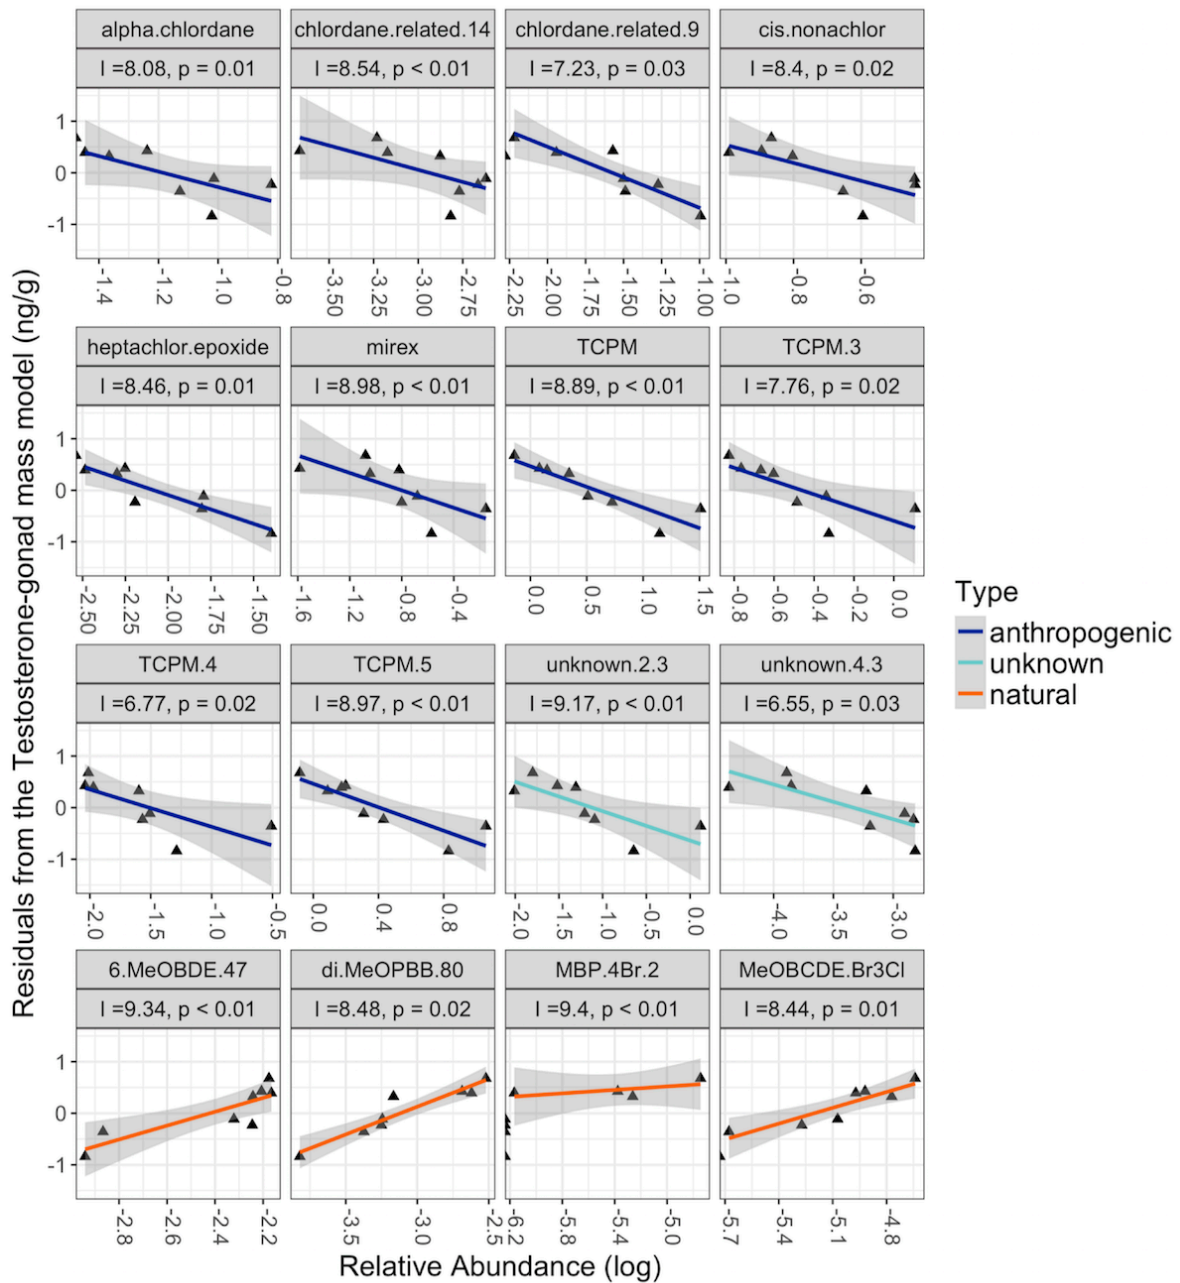

**Figure S5:** The relative abundance of individual compounds that significantly correlated with gonad mass adjusted testosterone concentration and had a variable importance greater than five. Variable importance in %IncMSE (I) and a p-value (p) is provided for each compound. Color denotes the origin of the compound (anthropogenic, unknown, or natural).

## REFERENCES

- (1) Liaw, A.; Wiener, M. Classification and regression by randomForest. *R News* **2002**, 2 (3), 18–22.
- (2) Archer, F. I. *rfPermute: Estimate permutation p-values for Random Forest importance metrics.*; 2016.
- (3) Sonne, C.; Torjesen, P. A.; Fuglei, E.; Muir, D. C. G.; Jenssen, B. M.; Jørgensen, E.; Dietz, R.; Ahlstrøm, Ø. Exposure to persistent organic pollutants reduces testosterone concentrations and affects sperm viability and morphology during the mating peak-period in a controlled experiment on farmed Arctic foxes (*Vulpes lagopus*). *Environ. Sci. Technol.* **2017**, 51 (8), 4673–4680.
- (4) Shaul, N. J.; Dodder, N. G.; Aluwihare, L. I.; Mackintosh, S. A.; Maruya, K. A.; Chivers, S. J.; Danil, K.; Weller, D. W.; Hoh, E. Nontargeted Biomonitoring of Halogenated Organic Compounds in Two Ecotypes of Bottlenose Dolphins (*Tursiops truncatus*) from the Southern California Bight. *Environ. Sci. Technol.* **2015**, 49 (3), 1328–1338.
